# Supplementary material for: Musashi2 promotes the development and progression of pancreatic cancer by down-regulating Numb protein
Source: PubMed Central journal article supplement (PMC5362411; doi:10.18632/oncotarget.8736), 2016-04-15
Supplement: oncotarget-08-14359-s001.pdf [file oncotarget-08-14359-s001.pdf]

## SUPPLEMENTARY TABLES

Supplementary Table S1: Clinical data of 75 PC patients

| Parameters                     | No. of patients |
|--------------------------------|-----------------|
| Total Cases                    | 75              |
| Age(years)                     |                 |
| ≤65                            | 55              |
| >65                            | 20              |
| Gender                         |                 |
| Male                           | 52              |
| Female                         | 23              |
| Tumor location                 |                 |
| Head                           | 54              |
| Body-tail                      | 21              |
| Tumor size(cm)                 |                 |
| <2.5                           | 25              |
| ≥2.5                           | 50              |
| Differentiation                |                 |
| Well                           | 27              |
| Moderate and poor              | 48              |
| T stage                        |                 |
| T1+T2                          | 21              |
| T3+T4                          | 54              |
| Lymph nodes metastasis         |                 |
| N0(negative)                   | 55              |
| N1(positive)                   | 20              |
| UICC stage                     |                 |
| I+IIA                          | 51              |
| IIB+III                        | 24              |
| Perineural invasion            |                 |
| Absent                         | 61              |
| Present                        | 14              |
| Vascular permeation            |                 |
| Absent                         | 42              |
| Present                        | 33              |
| Pre-therapeutic CA19-9 level   |                 |
| <37 U/ml                       | 23              |
| ≥37 U/ml                       | 52              |
| Postoperative Liver metastasis |                 |
| Negative                       | 48              |
| Positive                       | 27              |

Supplementary Table S2: The target sequences of shMSI2-1, shMSI2-1, scramble, Numb siRNA and siRNA control

| Gene | Oligo Name    | Oligo Sequence                                                                                             |
|------|---------------|------------------------------------------------------------------------------------------------------------|
| MSI2 | shMSI2-1      | TGCTGTTGACAGTGAGCGACCGGATTTGCTCCTAGCTATGTA<br>GTGAAGCCACAGATGTACATAGCTAGGAGCAAATCCGGGT<br>GCCTACTGCCTCGGA  |
|      | shMSI2-1      | TGCTGTTGACAGTGAGCGCGCAAGTG TAGATAAAGTA<br>TTATAGTGAAGCCACAGATGTATAATACTTTATCTACACT<br>TGCTTGCCTACTGCCTCGGA |
| NA   | Scramble      | TGCTGTTGACAGTGAGCGCAAGGTTAAGTCGCCCTCGCTC<br>TAGTGAAGCCACAGATGTAGAGCGAGGGCGACTTAA<br>CCTTATGCCTACTGCCTCGGA  |
| Numb | siRNA1        | Sense: 5' CUGGAAAGAAAGCAGUUAATT 3'<br>Antisense: 5' UUAACUGCUUUCUUUCCAGTT 3'                               |
|      | siRNA2        | Sense: 5' GAAGAUGUCACCCUUUAAATT 3'<br>Antisense: 5' UUUAAAGGUGACAUCUUCTT 3'                                |
|      | siRNA3        | Sense: 5' GGAUCUGUCACUGCUUCAUTT 3'<br>Antisense: 5' AUGAAGCAGUGACAGAUCCTT 3'                               |
| NC   | siRNA control | Sense: 5' UUCUCCGAACGUGUCACGUTT 3'<br>Antisense: 5' UUCUCCGAACGUGUCACGUTT 3'                               |
